# Supplementary material for: Rapid Epidemiological Analysis of Comorbidities and Treatments as risk factors for COVID-19 in Scotland (REACT-SCOT): A population-based case-control study
Source: PubMed Central journal article supplement (PMC7575101; doi:10.1371/journal.pmed.1003374), 2020-10-20
Supplement: pmed.1003374.s003.pdf [file pmed.1003374.s003.pdf]

**Table S3.** Associations of severe disease with listed conditions in those aged 75 years and over

|                                                | Univariate       |              |                     | Multivariable        |                     |                      |
|------------------------------------------------|------------------|--------------|---------------------|----------------------|---------------------|----------------------|
|                                                | Controls (23476) | Cases (2916) | Rate ratio (95% CI) | p-value              | Rate ratio (95% CI) | p-value              |
| Care home                                      | 2841 (12%)       | 1698 (58%)   | 19.3 (17.2, 21.7)   | $2 \times 10^{-539}$ | 13.9 (12.3, 15.7)   | $6 \times 10^{-372}$ |
| Any prescription                               | 22665 (97%)      | 2872 (98%)   | 2.30 (1.69, 3.14)   | $1 \times 10^{-7}$   | 1.13 (0.80, 1.60)   | 0.5                  |
| Any admission                                  | 16527 (70%)      | 2508 (86%)   | 2.50 (2.24, 2.79)   | $5 \times 10^{-59}$  | 1.34 (1.17, 1.53)   | $2 \times 10^{-5}$   |
| Type 1 diabetes                                | 70 (0%)          | 21 (1%)      | 2.73 (1.67, 4.49)   | $7 \times 10^{-5}$   | 1.63 (0.90, 2.97)   | 0.1                  |
| Type 2 diabetes                                | 3970 (17%)       | 613 (21%)    | 1.38 (1.25, 1.53)   | $1 \times 10^{-10}$  | 1.26 (1.12, 1.41)   | $8 \times 10^{-5}$   |
| Other/unknown type                             | 184 (1%)         | 22 (1%)      | 1.16 (0.74, 1.81)   | 0.5                  | 0.95 (0.56, 1.61)   | 0.8                  |
| Ischaemic heart disease                        | 4392 (19%)       | 702 (24%)    | 1.35 (1.23, 1.48)   | $4 \times 10^{-10}$  | 1.07 (0.96, 1.20)   | 0.2                  |
| Other heart disease                            | 7192 (31%)       | 1411 (48%)   | 2.03 (1.87, 2.20)   | $2 \times 10^{-66}$  | 1.37 (1.24, 1.53)   | $2 \times 10^{-9}$   |
| Asthma or chronic airway disease               | 5306 (23%)       | 970 (33%)    | 1.73 (1.59, 1.88)   | $6 \times 10^{-36}$  | 1.43 (1.29, 1.58)   | $6 \times 10^{-12}$  |
| Chronic kidney disease or transplant recipient | 163 (1%)         | 57 (2%)      | 2.67 (1.94, 3.67)   | $2 \times 10^{-9}$   | 2.19 (1.49, 3.20)   | $6 \times 10^{-5}$   |
| Neurological (except epilepsy) or dementia     | 2897 (12%)       | 1154 (40%)   | 5.00 (4.56, 5.48)   | $2 \times 10^{-263}$ | 1.88 (1.68, 2.10)   | $3 \times 10^{-29}$  |
| Liver disease                                  | 59 (0%)          | 20 (1%)      | 2.88 (1.72, 4.83)   | $6 \times 10^{-5}$   | 1.45 (0.77, 2.76)   | 0.3                  |
| Immune deficiency or suppression               | 76 (0%)          | 11 (0%)      | 1.26 (0.66, 2.40)   | 0.5                  | 1.24 (0.59, 2.58)   | 0.6                  |
