# Supplementary material for: Rapid Epidemiological Analysis of Comorbidities and Treatments as risk factors for COVID-19 in Scotland (REACT-SCOT): A population-based case-control study
Source: PubMed Central journal article supplement (PMC7575101; doi:10.1371/journal.pmed.1003374), 2020-10-20
Supplement: pmed.1003374.s006.pdf [file pmed.1003374.s006.pdf]

**Table S6.** Associations of severe disease with prescribed drugs by BNF chapter in those without any listed condition

|                        | Univariate       |             |                     |                     | Multivariable       |                     |                     |                     |
|------------------------|------------------|-------------|---------------------|---------------------|---------------------|---------------------|---------------------|---------------------|
|                        | Controls (17793) | Cases (945) | Rate ratio (95% CI) | <i>p</i> -value     | Rate ratio (95% CI) | <i>p</i> -value     | Rate ratio (95% CI) | <i>p</i> -value     |
| BNF 1 Gastro           | 6611 (37%)       | 516 (55%)   | 2.14 (1.84, 2.50)   | $6 \times 10^{-22}$ | 1.46 (1.22, 1.75)   | $3 \times 10^{-5}$  | 1.46 (1.22, 1.75)   | $3 \times 10^{-5}$  |
| BNF 2 Cardiovascular   | 9095 (51%)       | 507 (54%)   | 1.23 (1.04, 1.45)   | 0.01                | 1.01 (0.85, 1.20)   | 0.9                 | 1.01 (0.85, 1.20)   | 0.9                 |
| BNF 3 Respiratory      | 1318 (7%)        | 100 (11%)   | 1.55 (1.21, 1.99)   | $6 \times 10^{-4}$  | 1.09 (0.83, 1.43)   | 0.5                 | 1.09 (0.83, 1.43)   | 0.5                 |
| BNF 4 Nervous          | 7056 (40%)       | 584 (62%)   | 2.52 (2.15, 2.95)   | $4 \times 10^{-30}$ | 1.79 (1.49, 2.14)   | $4 \times 10^{-10}$ | 1.79 (1.49, 2.14)   | $4 \times 10^{-10}$ |
| BNF 5 Infections       | 3780 (21%)       | 341 (36%)   | 2.17 (1.83, 2.56)   | $1 \times 10^{-19}$ | 1.63 (1.36, 1.95)   | $2 \times 10^{-7}$  | 1.63 (1.36, 1.95)   | $2 \times 10^{-7}$  |
| BNF 6 Endocrine        | 2952 (17%)       | 195 (21%)   | 1.33 (1.09, 1.62)   | 0.005               | 0.99 (0.79, 1.23)   | 0.9                 | 0.99 (0.79, 1.23)   | 0.9                 |
| BNF 7 Obstetrics       | 2231 (13%)       | 106 (11%)   | 0.96 (0.75, 1.21)   | 0.7                 | 0.67 (0.52, 0.87)   | 0.002               | 0.67 (0.52, 0.87)   | 0.002               |
| BNF 8 Malignant        | 356 (2%)         | 32 (3%)     | 2.19 (1.35, 3.56)   | 0.002               | 1.45 (0.87, 2.42)   | 0.2                 | 1.45 (0.87, 2.42)   | 0.2                 |
| BNF 9 Nutrition        | 3242 (18%)       | 309 (33%)   | 2.40 (1.99, 2.89)   | $2 \times 10^{-20}$ | 1.63 (1.33, 2.00)   | $3 \times 10^{-6}$  | 1.63 (1.33, 2.00)   | $3 \times 10^{-6}$  |
| BNF 10 Musculoskeletal | 3723 (21%)       | 250 (26%)   | 1.49 (1.25, 1.77)   | $5 \times 10^{-6}$  | 1.00 (0.83, 1.21)   | 1                   | 1.00 (0.83, 1.21)   | 1                   |
| BNF 11 Eye             | 2151 (12%)       | 117 (12%)   | 1.02 (0.80, 1.29)   | 0.9                 | 0.80 (0.62, 1.04)   | 0.09                | 0.80 (0.62, 1.04)   | 0.09                |
| BNF 12 Ear             | 1693 (10%)       | 77 (8%)     | 1.01 (0.77, 1.31)   | 1                   | 0.67 (0.50, 0.89)   | 0.006               | 0.67 (0.50, 0.89)   | 0.006               |
| BNF 13 Skin            | 3723 (21%)       | 292 (31%)   | 1.72 (1.45, 2.04)   | $3 \times 10^{-10}$ | 1.12 (0.93, 1.36)   | 0.2                 | 1.12 (0.93, 1.36)   | 0.2                 |
| BNF 14 Other           | 3884 (22%)       | 375 (40%)   | 2.43 (2.05, 2.88)   | $1 \times 10^{-24}$ | 1.81 (1.50, 2.20)   | $1 \times 10^{-9}$  | 1.81 (1.50, 2.20)   | $1 \times 10^{-9}$  |
