# Supplementary material for: Rapid Epidemiological Analysis of Comorbidities and Treatments as risk factors for COVID-19 in Scotland (REACT-SCOT): A population-based case-control study
Source: PubMed Central journal article supplement (PMC7575101; doi:10.1371/journal.pmed.1003374), 2020-10-20
Supplement: pmed.1003374.s007.pdf [file pmed.1003374.s007.pdf]

**Table S7.** Univariate associations of severe disease with hospital diagnoses by ICD subchapters in those without any listed conditions: rows retained are those with  $p < 0.001$  and at least 50 cases and controls

|                                                                                                                                               | Controls<br>(17793) | Cases<br>(945) | Rate ratio (95% CI) | p-value             |
|-----------------------------------------------------------------------------------------------------------------------------------------------|---------------------|----------------|---------------------|---------------------|
| Ch I: A30-A49 Other Bacterial Diseases                                                                                                        | 106 (1%)            | 23 (2%)        | 6.3 (3.2, 12.4)     | $1 \times 10^{-7}$  |
| Ch I: B95-B98 Bacterial And Viral Infectious Agents                                                                                           | 231 (1%)            | 34 (4%)        | 2.71 (1.69, 4.33)   | $3 \times 10^{-5}$  |
| Ch II: C15-C26 Malignant Neoplasms Of Digestive Organs                                                                                        | 95 (1%)             | 15 (2%)        | 8.2 (3.7, 18.0)     | $2 \times 10^{-7}$  |
| Ch II: C76-C80 Malignant Neoplasms Of Ill-Defined, Other Secondary And Unspecified Sites                                                      | 110 (1%)            | 20 (2%)        | 5.4 (2.9, 10.1)     | $1 \times 10^{-7}$  |
| Ch II: C81-C96 Malignant Neoplasms Of Lymphoid, Hematopoietic And Related Tissue                                                              | 56 (0%)             | 13 (1%)        | 5.7 (2.5, 12.8)     | $3 \times 10^{-5}$  |
| Ch II: D37-D48 Neoplasms Of Uncertain Behavior, Polycythemia Vera And Myelodysplastic Syndromes                                               | 73 (0%)             | 9 (1%)         | 5.3 (2.0, 14.4)     | $9 \times 10^{-4}$  |
| Ch IV: E70-E88 Metabolic Disorders                                                                                                            | 225 (1%)            | 33 (3%)        | 2.72 (1.68, 4.41)   | $5 \times 10^{-5}$  |
| Ch V: F01-F09 Mental Disorders Due To Known Physiological Conditions                                                                          | 227 (1%)            | 84 (9%)        | 10.5 (6.5, 17.0)    | $2 \times 10^{-21}$ |
| Ch V: F30-F39 Mood [Affective] Disorders                                                                                                      | 58 (0%)             | 14 (1%)        | 4.94 (2.24, 10.92)  | $8 \times 10^{-5}$  |
| Ch IX: I60-I69 Cerebrovascular Diseases                                                                                                       | 193 (1%)            | 27 (3%)        | 2.61 (1.49, 4.58)   | $8 \times 10^{-4}$  |
| Ch X: J09-J18 Influenza And Pneumonia                                                                                                         | 200 (1%)            | 34 (4%)        | 3.47 (2.09, 5.75)   | $1 \times 10^{-6}$  |
| Ch X: J20-J22 Other Acute Lower Respiratory Infections                                                                                        | 163 (1%)            | 44 (5%)        | 7.2 (4.3, 12.0)     | $9 \times 10^{-14}$ |
| Ch XII: L80-L99 Other Disorders Of The Skin And Subcutaneous Tissue                                                                           | 108 (1%)            | 17 (2%)        | 4.02 (2.05, 7.90)   | $5 \times 10^{-5}$  |
| Ch XIV: N17-N19 Acute Kidney Failure And Chronic Kidney Disease                                                                               | 371 (2%)            | 58 (6%)        | 3.94 (2.63, 5.92)   | $4 \times 10^{-11}$ |
| Ch XIV: N30-N39 Other Diseases Of The Urinary System                                                                                          | 615 (3%)            | 87 (9%)        | 3.41 (2.48, 4.68)   | $5 \times 10^{-14}$ |
| Ch XVIII: R25-R29 Symptoms And Signs Involving The Nervous And Musculoskeletal Systems                                                        | 310 (2%)            | 67 (7%)        | 4.29 (2.87, 6.41)   | $1 \times 10^{-12}$ |
| Ch XVIII: R40-R46 Symptoms And Signs Involving Cognition, Perception, Emotional State And Behavior                                            | 220 (1%)            | 47 (5%)        | 4.67 (2.99, 7.30)   | $1 \times 10^{-11}$ |
| Ch XVIII: R50-R69 General Symptoms And Signs                                                                                                  | 492 (3%)            | 56 (6%)        | 2.02 (1.42, 2.89)   | $1 \times 10^{-4}$  |
| Ch XVIII: R90-R94 Abnormal Findings On Diagnostic Imaging And In Function Studies, Without Diagnosis                                          | 168 (1%)            | 25 (3%)        | 2.87 (1.66, 4.96)   | $2 \times 10^{-4}$  |
| Ch XIX: S70-S79 Injuries To The Hip And Thigh                                                                                                 | 248 (1%)            | 52 (6%)        | 3.18 (2.00, 5.05)   | $9 \times 10^{-7}$  |
| Ch XX: W00-W19 Slipping, Tripping, Stumbling And Falls                                                                                        | 763 (4%)            | 99 (10%)       | 2.42 (1.79, 3.27)   | $1 \times 10^{-8}$  |
| Ch XXI: Z40-Z54 Encounters For Other Specific Health Care                                                                                     | 730 (4%)            | 66 (7%)        | 1.88 (1.38, 2.58)   | $8 \times 10^{-5}$  |
| Ch XXI: Z77-Z99 Persons With Potential Health Hazards Related To Family And Personal History And Certain Conditions Influencing Health Status | 1373 (8%)           | 107 (11%)      | 1.62 (1.26, 2.07)   | $2 \times 10^{-4}$  |
